# Supplementary material
Source: Springer Nature journal article supplement (https://www.springermedizin.de/resource/supplementary/12955_2011_887_MOESM1_ESM.PDF/9558576)
Supplement: MOESM1 [file 9558576]

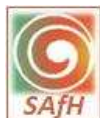

## Social Action for Health

### Identifying Challenges to Quality Of Life - Questionnaire 2010

Name of Client :

Name of interviewer :

#### INTRODUCTION

Thank you very much for agreeing to talk to me about your experiences when accessing health care services. We hope that the results will make an impact on your overall life quality. I'd like to start by saying that everything you say to me will be kept confidential to two of us that are conducting these surveys. A report will be compiled and no names will be mentioned. Nothing will be reported to anyone else in a way that will allow you to be identified.

I'd like to ask you about several different things. I reckon this will take about 15 minutes. If you do not want to answer any of the questions it is all right. Is that OK?

#### ABOUT YOU

1. What is your gender? male ☐ female ☐

2. What is your date of birth? \_\_\_\_ / \_\_\_\_ / \_\_\_\_  
day / month / year

3. What is the highest education you received?

none at all ☐ primary school ☐ secondary school ☐ tertiary ☐

4. What is your marital status?

single ☐ married ☐ living with partner ☐ separated ☐ divorced ☐ widowed ☐

5. How do you describe your household type?

\_\_\_\_ adult/adults, \_\_\_\_ child/children, \_\_\_\_ other person (please state \_\_\_\_\_)

6. How do you describe your employment status? (please see the table at last page about explanation of jobs)

- |                                                              |                                                     |
|--------------------------------------------------------------|-----------------------------------------------------|
| 1. Managerial/professional <input type="checkbox"/>          | 5. State pensioner/retired <input type="checkbox"/> |
| 2. Middle management <input type="checkbox"/>                | 6. Off sick/disabled <input type="checkbox"/>       |
| 3. Skilled manual worker <input type="checkbox"/>            | 7. Unemployed <input type="checkbox"/>              |
| 4. Semi and unskilled manual worker <input type="checkbox"/> | 8. Student <input type="checkbox"/>                 |

(please go to question 16 if you cross boxes 5, 6, 7 or 8)

7. Are you householder of your family? If not how do you describe employment status of your family's chief economic supporter?

- |                                                              |                                                     |
|--------------------------------------------------------------|-----------------------------------------------------|
| 1. Managerial/professional <input type="checkbox"/>          | 5. State pensioner/retired <input type="checkbox"/> |
| 2. Middle management <input type="checkbox"/>                | 6. Off sick/disabled <input type="checkbox"/>       |
| 3. Skilled manual worker <input type="checkbox"/>            | 7. Unemployed <input type="checkbox"/>              |
| 4. Semi and unskilled manual worker <input type="checkbox"/> |                                                     |

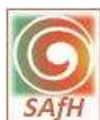

## Social Action for Health

### Identifying Challenges to Quality Of Life - Questionnaire 2010

|                                                                            |                    |                        |                           |                        |                    |
|----------------------------------------------------------------------------|--------------------|------------------------|---------------------------|------------------------|--------------------|
| 8. Would you mind if I ask you to compare your income with the community?* | well below average | slightly below average | average levels of society | a little above average | much above average |
|                                                                            | 1                  | 2                      | 3                         | 4                      | 5                  |

9. In which sector you are working? service ☐ industry ☐ agriculture ☐

10. For how long you have been working in this sector? For \_\_\_\_\_ years and \_\_\_\_\_ months.

11. For how long you have been working in this workplace? For \_\_\_\_\_ years and \_\_\_\_\_ months.

|                                                         |            |          |            |           |           |
|---------------------------------------------------------|------------|----------|------------|-----------|-----------|
|                                                         | not at all | slightly | moderately | very much | extremely |
| 12. Does your job fulfill you?                          | 1          | 2        | 3          | 4         | 5         |
| 13. Do you feel valued and respected in your workplace? | 1          | 2        | 3          | 4         | 5         |

|                                                                 |       |        |           |       |        |
|-----------------------------------------------------------------|-------|--------|-----------|-------|--------|
|                                                                 | never | rarely | sometimes | often | always |
| 14. Are you suffering from workplace stress?                    | 1     | 2      | 3         | 4     | 5      |
| 15. How often do you get help and support from your co-workers? | 1     | 2      | 3         | 4     | 5      |

16. In which country did you born? \_\_\_\_\_

17. How would you describe your ethnic group?

|                                                                                                                                                                                                                                                                                                                                                                                                                                  |                                                                                                                                                                                                                                                                                                                                                                                                                                               |                                                                                                                                                                                                                                                                                        |
|----------------------------------------------------------------------------------------------------------------------------------------------------------------------------------------------------------------------------------------------------------------------------------------------------------------------------------------------------------------------------------------------------------------------------------|-----------------------------------------------------------------------------------------------------------------------------------------------------------------------------------------------------------------------------------------------------------------------------------------------------------------------------------------------------------------------------------------------------------------------------------------------|----------------------------------------------------------------------------------------------------------------------------------------------------------------------------------------------------------------------------------------------------------------------------------------|
| <b>A. White</b><br>British <input type="checkbox"/><br>Irish <input type="checkbox"/><br>Any other White background <input type="checkbox"/><br>(please state _____)<br><br><b>B. Mixed</b><br>White and Black Caribbean <input type="checkbox"/><br>White and Black African <input type="checkbox"/><br>White and Asian <input type="checkbox"/><br>Any other Mixed background <input type="checkbox"/><br>(please state _____) | <b>C. Asian or Asian British</b><br>Indian <input type="checkbox"/><br>Pakistani <input type="checkbox"/><br>Bangladeshi <input type="checkbox"/><br>Any other Asian background <input type="checkbox"/><br>(please state _____)<br><br><b>D. Black or Black British</b><br>Black Caribbean <input type="checkbox"/><br>Black African <input type="checkbox"/><br>Any other Black background <input type="checkbox"/><br>(please state _____) | <b>E. Chinese or any other ethnic group</b><br>Chinese <input type="checkbox"/><br>Any other ethnic group <input type="checkbox"/><br>(please state _____)<br><br><b>F. Turkish Speaking Community</b><br>Turkish <input type="checkbox"/><br>Turkish Cypriot <input type="checkbox"/> |
|----------------------------------------------------------------------------------------------------------------------------------------------------------------------------------------------------------------------------------------------------------------------------------------------------------------------------------------------------------------------------------------------------------------------------------|-----------------------------------------------------------------------------------------------------------------------------------------------------------------------------------------------------------------------------------------------------------------------------------------------------------------------------------------------------------------------------------------------------------------------------------------------|----------------------------------------------------------------------------------------------------------------------------------------------------------------------------------------------------------------------------------------------------------------------------------------|

18. How long have you lived in Britain? For \_\_\_\_\_ years. / (☐ Born in UK)



## Social Action for Health

### Identifying Challenges to Quality Of Life - Questionnaire 2010

|                                                    | not at all | slightly | moderately | very much | extremely |
|----------------------------------------------------|------------|----------|------------|-----------|-----------|
| 19. Do you have sense of coherence within society? | 1          | 2        | 3          | 4         | 5         |

**20. What is the type of your housing tenure?**

- a. **Rented** ☐; local authority rented ☐ rented furnished ☐ other rented unfurnished ☐  
housing association or RSL ☐ rent free ☐
- b. **Owner occupied** ☐; with mortgage ☐ owned outright ☐

**21. If you are an immigrant what was your main reason for immigration to Britain?**

- work related ☐ accompany/join ☐ formal study ☐ other ☐ (please state: \_\_\_\_\_ )  
not an immigrant ☐ (please go to the question 23)

**22. What is your residential status in the Britain?**

- permanent residence ☐ temporary residence ☐ refugee ☐ asylum seeker ☐

| 23. Please rate level of your English? | can't speak English | not at all influential | somewhat influential | very influential | extremely influential |
|----------------------------------------|---------------------|------------------------|----------------------|------------------|-----------------------|
|                                        | 1                   | 2                      | 3                    | 4                | 5                     |

**24. Are you currently ill?** Yes ☐ No ☐

**25. If something is wrong with your health what do you think it is?** \_\_\_\_\_ illness/ problem

**26. Do you have any serious chronic illness?** Yes ☐ No ☐ (please state if yes \_\_\_\_\_ )

**27. Are you disabled?** Yes ☐ No ☐

**28. Do you consider yourself disabled?** Yes ☐ No ☐

**29. Are you registered with a GP?** Yes ☐ No ☐ (if you cross No please go to question 37)

**30. Do health and social care professionals make regular home visits?** Yes ☐ No ☐  
(for women, children and elderly)

**31. Do you experience difficulties when you are referring to a hospital?** Yes ☐ No ☐

**32. Do you experience difficulties after you referred to a hospital?** Yes ☐ No ☐



## Social Action for Health

### Identifying Challenges to Quality Of Life - Questionnaire 2010

|                                                                                        | very difficult | difficult | neutral | easy | very easy |
|----------------------------------------------------------------------------------------|----------------|-----------|---------|------|-----------|
| 33. How would you rate the level of financial difficulty in accessing health services? | 1              | 2         | 3       | 4    | 5         |
| 34. How would you rate the level of cultural obstacles in accessing health services?   | 1              | 2         | 3       | 4    | 5         |
| 35. How easily do you communicate with your health professionals in English?           | 1              | 2         | 3       | 4    | 5         |

**36. Who interprets for you when using the GP service?**

nobody ☐ spouse ☐ siblings ☐ my children ☐  
a family member ☐ a friend ☐ interpreter/ health advocate ☐

**37. Do you get primary health care in another way although you are registered with GP?** Yes ☐ No ☐

private GP ☐ other private doctor ☐ (please state: \_\_\_\_\_ )  
I am going to doctor in another country ☐

**38. If you are not registered to a GP how do you access to health services?**

private GP ☐ other private doctor ☐ (please state: \_\_\_\_\_ )  
I am going to doctor in another country ☐ I did not ever go to a doctor ☐

**39. Your weight \_\_\_\_\_ kg / your height \_\_\_\_\_ ft \_\_\_\_\_ in (or \_\_\_\_\_ cm)**

**40. How do you perceive your body image by weight and height?**

**By weight;** underweight ☐ normal weight ☐ overweight and obese ☐  
**By height;** short ☐ medium ☐ tall ☐

**41. Do you walk or do some other form of activity for exercise?** Yes ☐ No ☐

**If yes please state type and duration of exercise.** Type of exercise: \_\_\_\_\_  
\_\_\_\_\_ minutes in a day usually, \_\_\_\_\_ days per week usually.

**42. Do you smoke?** Yes ☐ No ☐ **If yes how many cigarettes per day do you usually smoke?**

Please write the number on the line and circle one response. \_\_\_\_\_ cigarettes per day.

10 or less ☐ 11 to 20 ☐ 21 to 30 ☐ 31 to 40 ☐ 41 or more ☐

**43. How soon after you wake up do you smoke your first cigarette?**

within five minutes ☐ 6-30 minutes ☐ more than 30 minutes ☐

**44. Do you drink alcohol?** Yes ☐ No ☐ **If yes please specify how many units per week.** (e.g. glass

wine= 2, pint of beer= 2, shot of whiskey= 1 unit) \_\_\_\_\_ units per day, \_\_\_\_\_ days per week usually.  
Total \_\_\_\_\_ units per week.



## Social Action for Health

### Identifying Challenges to Quality Of Life - Questionnaire 2010

#### WHOQOL-BREF

**Instructions:** This assessment asks how you feel about your quality of life, health, or other areas of your life. **Please answer all the questions.** If you are unsure about which response to give to a question, **please choose the one** that appears most appropriate. This can often be your first response.

**Sample question:** Please keep in mind your standards, hopes, pleasures and concerns. We ask that you think about your life **in the last two weeks**. For example, thinking about the last two weeks, a question might ask:

| SAMPLE QUESTION                                           | Not at all | Not much | Moderately | A great deal | Completely |
|-----------------------------------------------------------|------------|----------|------------|--------------|------------|
| Do you get the kind of support from others that you need? | 1          | 2        | 3          | 4            | 5          |

You should circle the number that best fits how much support you got from others over the last two weeks. So you would circle the number 4 if you got a great deal of support from others as follows.

| SAMPLE QUESTION                                           | Not at all | Not much | Moderately | A great deal | Completely |
|-----------------------------------------------------------|------------|----------|------------|--------------|------------|
| Do you get the kind of support from others that you need? | 1          | 2        | 3          | 4            | 5          |

You would circle number 1 if you did not get any of the support that you needed from others in the last two weeks.

**Please read each question, assess your feelings, and circle the number on the scale for each question that gives the best answer for you.**

|   |                                          | Very poor | Poor | Neither poor nor good | Good | Very good |
|---|------------------------------------------|-----------|------|-----------------------|------|-----------|
| 1 | How would you rate your quality of life? | 1         | 2    | 3                     | 4    | 5         |

|   |                                         | Very dissatisfied | Dissatisfied | Neither satisfied nor dissatisfied | Satisfied | Very satisfied |
|---|-----------------------------------------|-------------------|--------------|------------------------------------|-----------|----------------|
| 2 | How satisfied are you with your health? | 1                 | 2            | 3                                  | 4         | 5              |



## Social Action for Health

### Identifying Challenges to Quality Of Life - Questionnaire 2010

The following questions ask about **how much** you have experienced certain things in the last two weeks.

|          |                                                                                            | Not at all | A little | A moderate amount | Very much | An extreme amount |
|----------|--------------------------------------------------------------------------------------------|------------|----------|-------------------|-----------|-------------------|
| <b>3</b> | To what extent do you feel that physical pain prevents you from doing what you need to do? | 1          | 2        | 3                 | 4         | 5                 |
| <b>4</b> | How much do you need any medical treatment to function in your daily life?                 | 1          | 2        | 3                 | 4         | 5                 |
| <b>5</b> | How much do you enjoy life?                                                                | 1          | 2        | 3                 | 4         | 5                 |
| <b>6</b> | To what extent do you feel your life to be meaningful?                                     | 1          | 2        | 3                 | 4         | 5                 |
| <b>7</b> | How well are you able to concentrate                                                       | 1          | 2        | 3                 | 4         | 5                 |
| <b>8</b> | How safe do you feel in your daily life?                                                   | 1          | 2        | 3                 | 4         | 5                 |
| <b>9</b> | How healthy is your physical environment?                                                  | 1          | 2        | 3                 | 4         | 5                 |

The following questions ask about **how completely** you experience or were able to do certain things in the last two weeks.

|           |                                                                                | Not at all | A little | Moderately | Mostly | Completely |
|-----------|--------------------------------------------------------------------------------|------------|----------|------------|--------|------------|
| <b>10</b> | Do you have enough energy for everyday life?                                   | 1          | 2        | 3          | 4      | 5          |
| <b>11</b> | Are you able to accept your bodily appearance?                                 | 1          | 2        | 3          | 4      | 5          |
| <b>12</b> | Have you enough money to meet your needs?                                      | 1          | 2        | 3          | 4      | 5          |
| <b>13</b> | How available to you is the information that you need in your day-to-day life? | 1          | 2        | 3          | 4      | 5          |
| <b>14</b> | To what extent do you have the opportunity for leisure activities?             | 1          | 2        | 3          | 4      | 5          |

|           |                                      | Very poor | Poor | Neither poor nor good | Good | Very good |
|-----------|--------------------------------------|-----------|------|-----------------------|------|-----------|
| <b>15</b> | How well are you able to get around? | 1         | 2    | 3                     | 4    | 5         |



## Social Action for Health

### Identifying Challenges to Quality Of Life - Questionnaire 2010

The following questions ask you to say how **good or satisfied** you have felt about various aspects of your life over the last two weeks.

|    |                                                                                  | Very dissatisfied | Dissatisfied | Neither satisfied nor dissatisfied | Satisfied | Very satisfied |
|----|----------------------------------------------------------------------------------|-------------------|--------------|------------------------------------|-----------|----------------|
| 16 | How satisfied are you with your sleep?                                           | 1                 | 2            | 3                                  | 4         | 5              |
| 17 | How satisfied are you with your ability to perform your daily living activities? | 1                 | 2            | 3                                  | 4         | 5              |
| 18 | How satisfied are you with your capacity for work?                               | 1                 | 2            | 3                                  | 4         | 5              |
| 19 | How satisfied are you with yourself?                                             | 1                 | 2            | 3                                  | 4         | 5              |
| 20 | How satisfied are you with your personal relationships?                          | 1                 | 2            | 3                                  | 4         | 5              |
| 21 | How satisfied are you with your sex life?                                        | 1                 | 2            | 3                                  | 4         | 5              |
| 22 | How satisfied are you with the support you get from your friends?                | 1                 | 2            | 3                                  | 4         | 5              |

The following questions ask you to say how **good or satisfied** you have felt about various aspects of your life over the last two weeks.

|    |                                                                 | Very dissatisfied | Dissatisfied | Neither satisfied nor dissatisfied | Satisfied | Very satisfied |
|----|-----------------------------------------------------------------|-------------------|--------------|------------------------------------|-----------|----------------|
| 23 | How satisfied are you with the conditions of your living place? | 1                 | 2            | 3                                  | 4         | 5              |
| 24 | How satisfied are you with your access to health services?      | 1                 | 2            | 3                                  | 4         | 5              |
| 25 | How satisfied are you with your transport?                      | 1                 | 2            | 3                                  | 4         | 5              |

The following question refers to **how often** you have felt or experienced certain things in the last two weeks.

|    |                                                                                          | Never | Seldom | Quite often | Very often | Always |
|----|------------------------------------------------------------------------------------------|-------|--------|-------------|------------|--------|
| 26 | How often do you have negative feelings such as blue mood, despair, anxiety, depression? | 1     | 2      | 3           | 4          | 5      |

**THANK YOU FOR YOUR HELP**
